# Supplementary material
Source: PubMed Central journal article supplement (PMC2661100)
Supplement: 00051.2008_1.pdf [file 00051.2008_1.pdf]

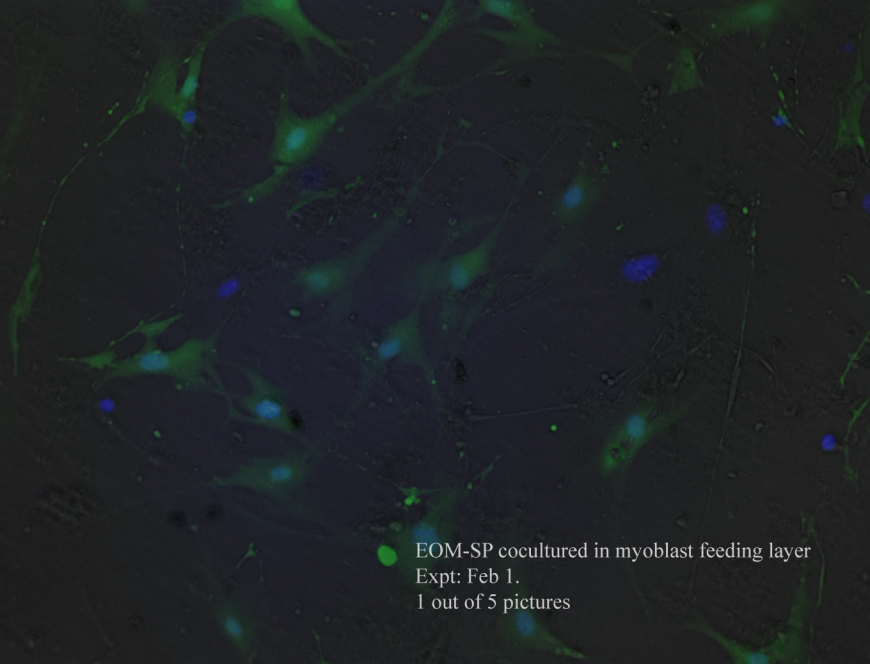

EOM-SP cocultured in myoblast feeding layer  
Expt: Feb 1.  
1 out of 5 pictures



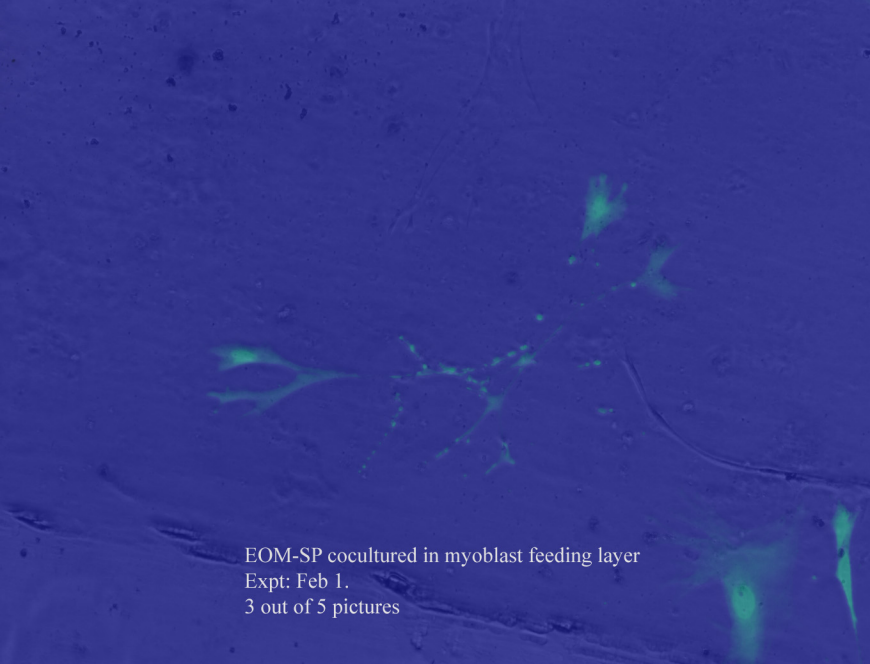

EOM-SP cocultured in myoblast feeding layer  
Expt: Feb 1.  
3 out of 5 pictures





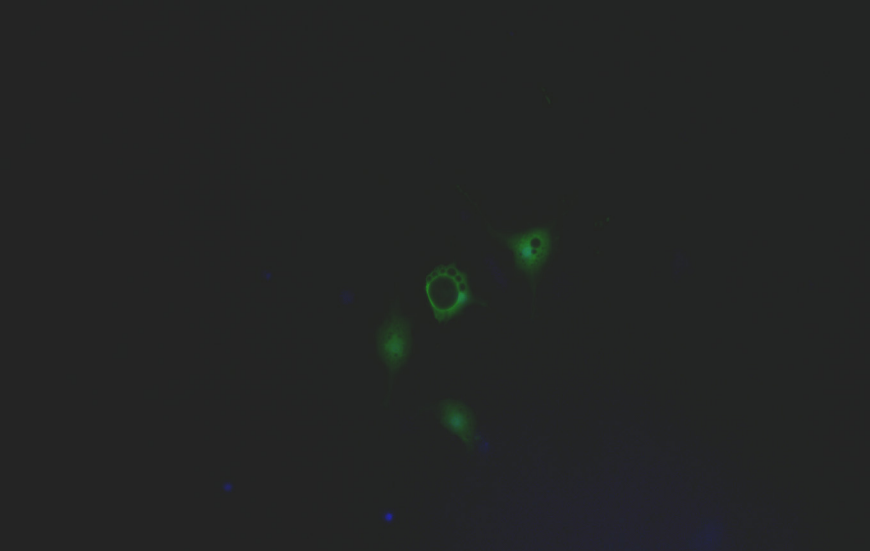A fluorescence microscopy image showing several cells. The cells exhibit green fluorescence, likely indicating the presence of a specific marker or protein. The cells are distributed across the field of view, with some showing more intense or distinct fluorescence than others. The background is dark, typical of a fluorescence micrograph.

TA-SP cocultured in myoblast feeding layer  
Expt: Feb 1.  
1 out of 7 pictures

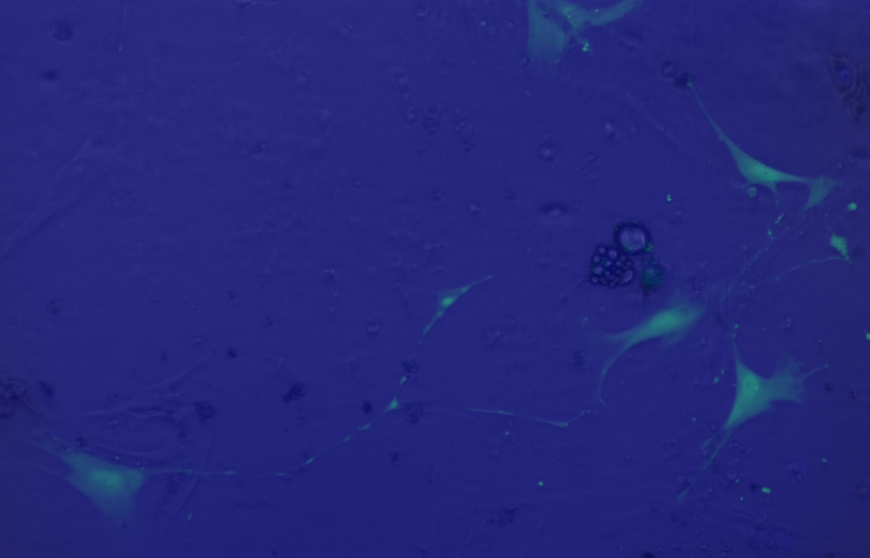

TA-SP cocultured in myoblast feeding layer  
Expt: Feb 1.  
2 out of 7 pictures

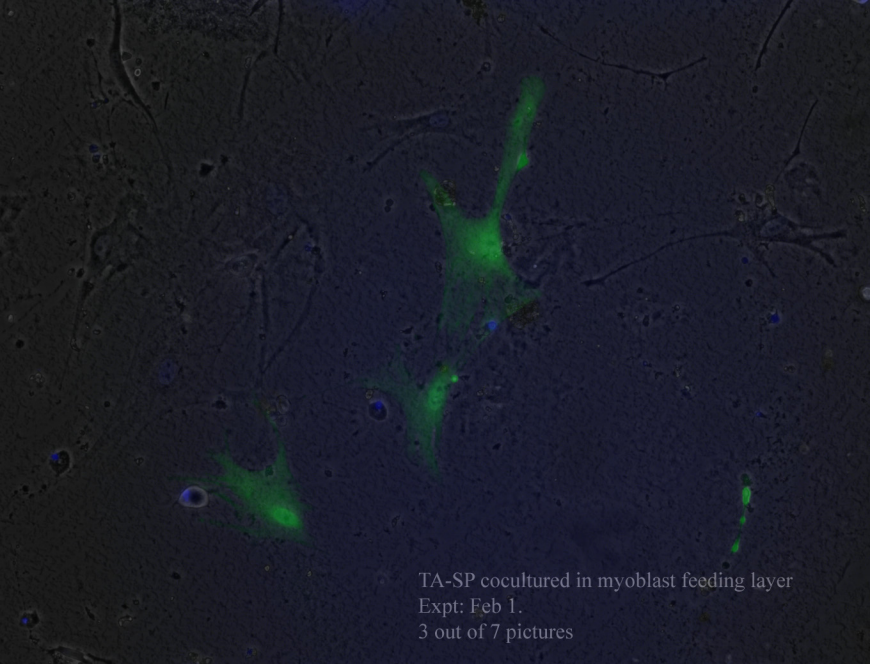

TA-SP cocultured in myoblast feeding layer  
Expt: Feb 1.  
3 out of 7 pictures









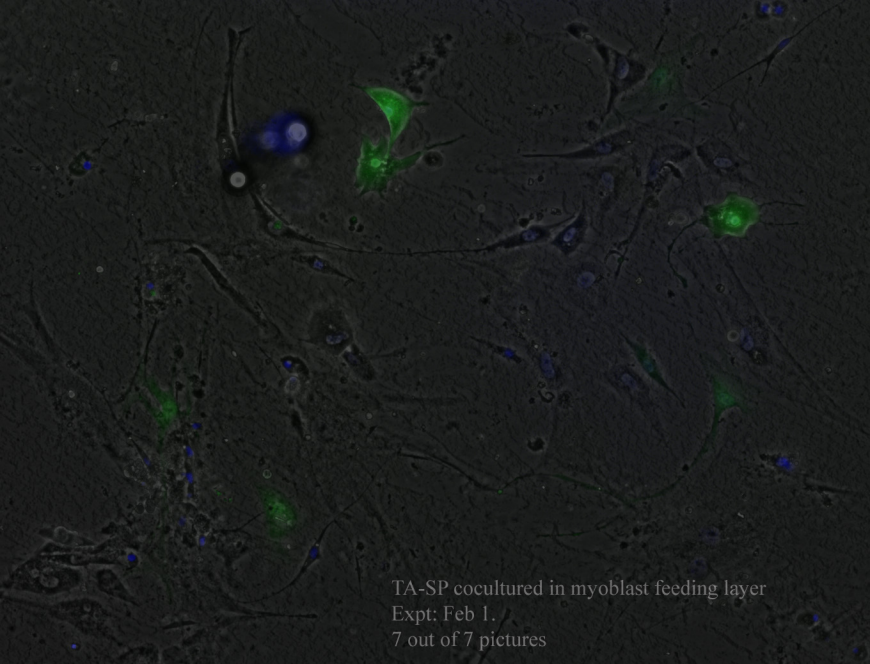

TA-SP cocultured in myoblast feeding layer  
Expt: Feb 1.  
7 out of 7 pictures
