# Supplementary material
Source: PubMed Central journal article supplement (PMC2661100)
Supplement: 00051.2008_2.pdf [file 00051.2008_2.pdf]

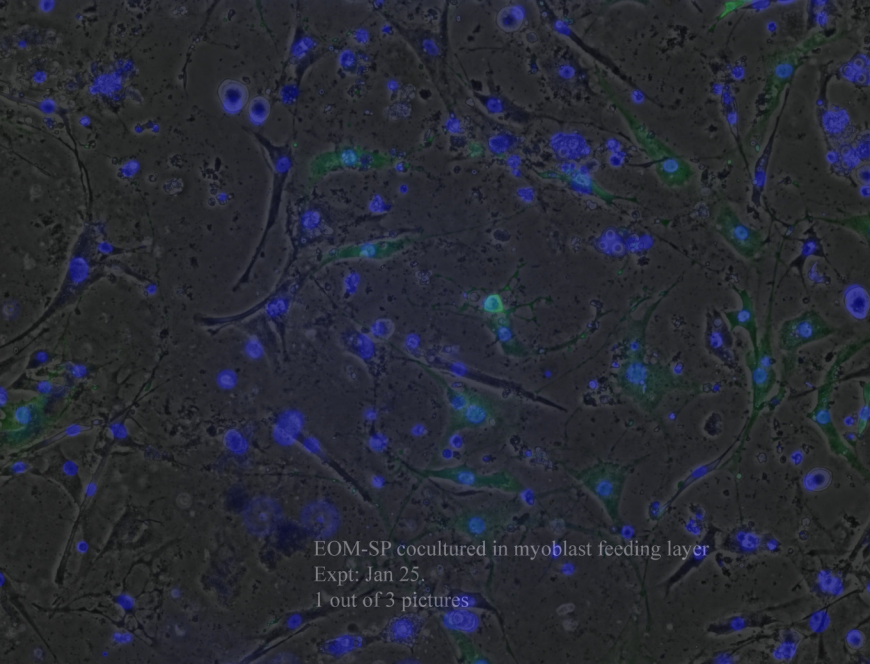

EOM-SP cocultured in myoblast feeding layer  
Expt: Jan 25.  
1 out of 3 pictures

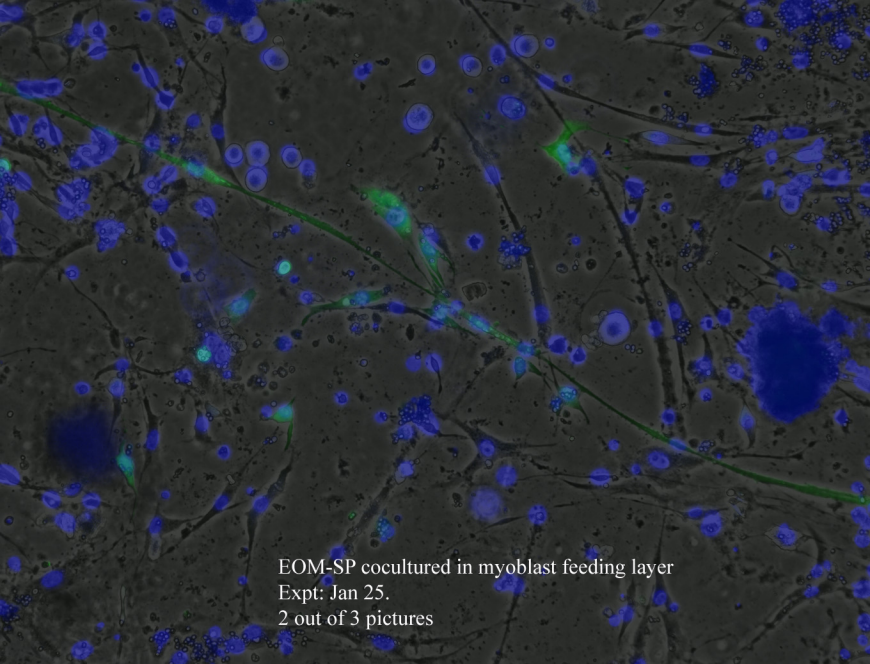

EOM-SP cocultured in myoblast feeding layer  
Expt: Jan 25.  
2 out of 3 pictures

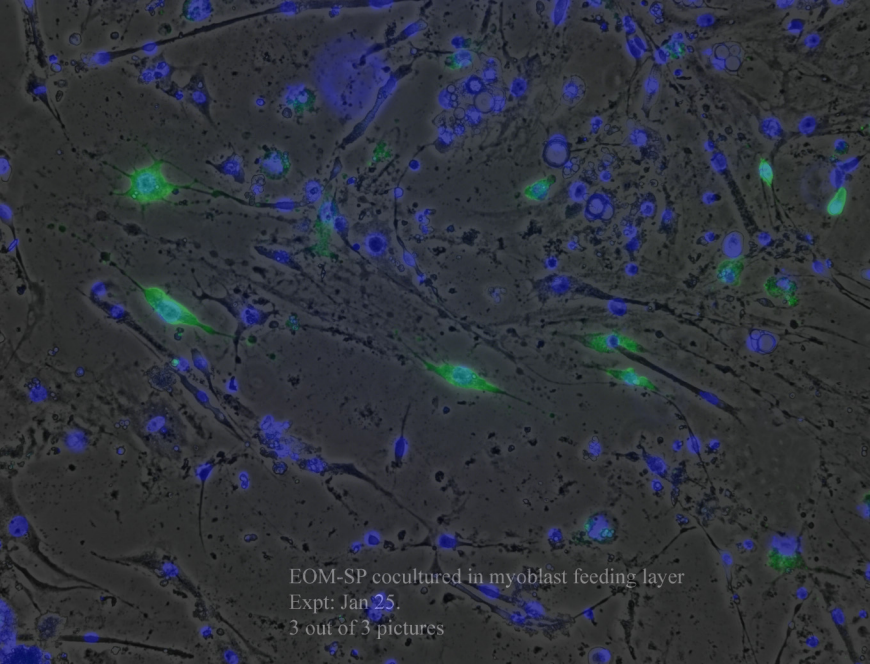

EOM-SP cocultured in myoblast feeding layer  
Expt: Jan 25.  
3 out of 3 pictures

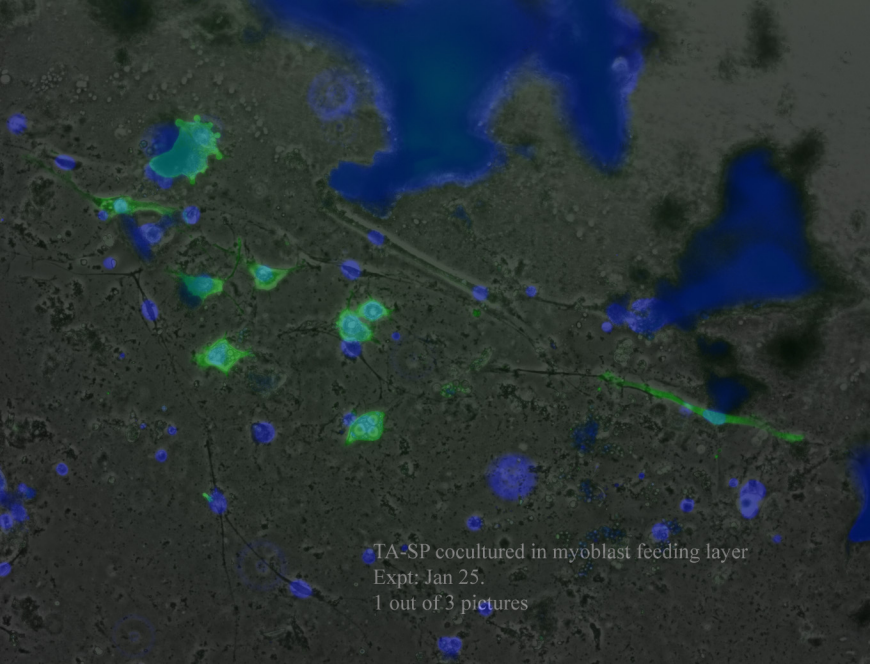

TA-SP cocultured in myoblast feeding layer

Expt: Jan 25.

1 out of 3 pictures

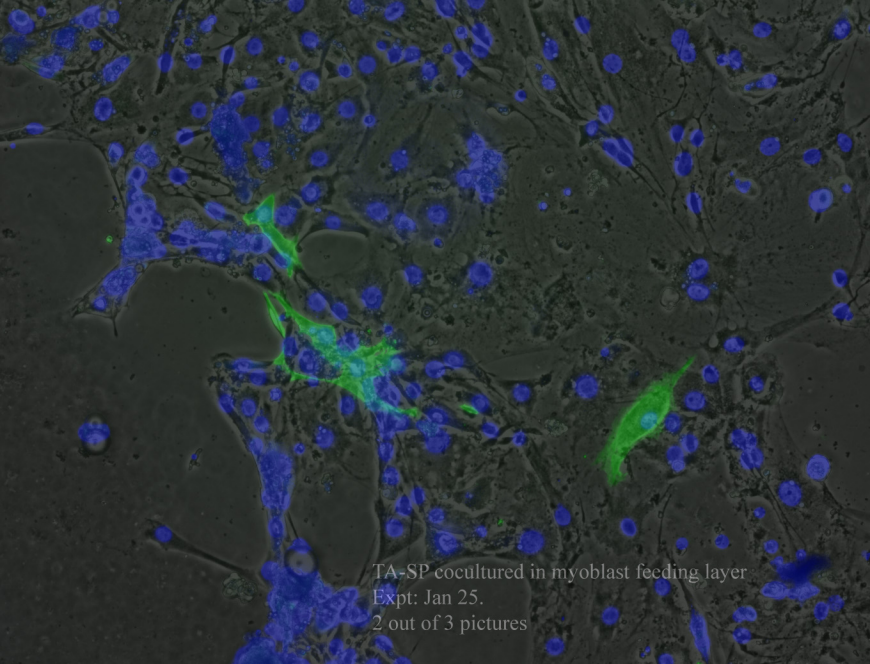

TA-SP cocultured in myoblast feeding layer

Expt: Jan 25.

2 out of 3 pictures

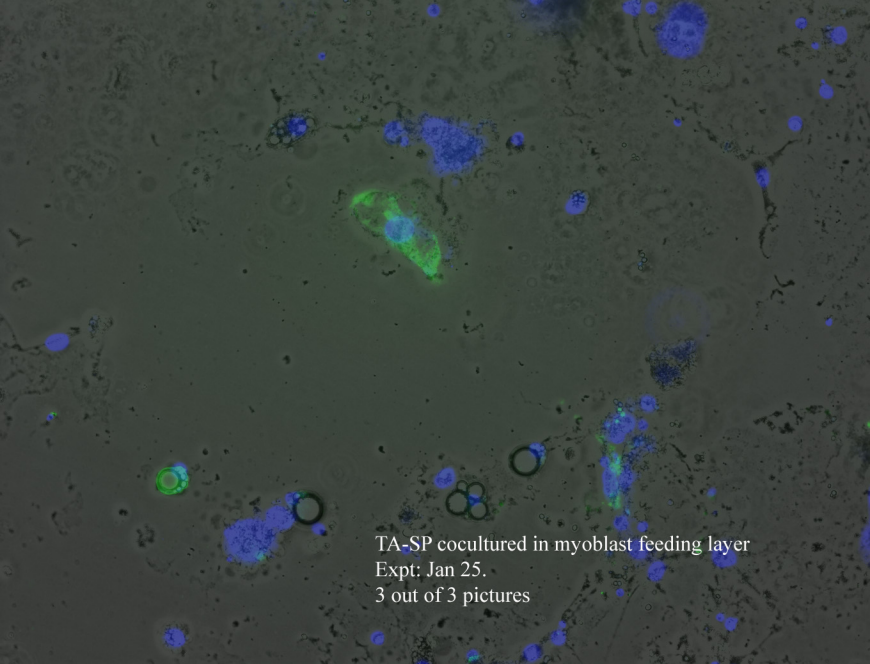

TA-SP cocultured in myoblast feeding layer  
Expt: Jan 25.  
3 out of 3 pictures
