# Supplementary material
Source: PubMed Central journal article supplement (PMC2661100)
Supplement: 00051.2008_4.pdf [file 00051.2008_4.pdf]



EOM-SP cultured alone for 13 days  
1 out of 31 pictures

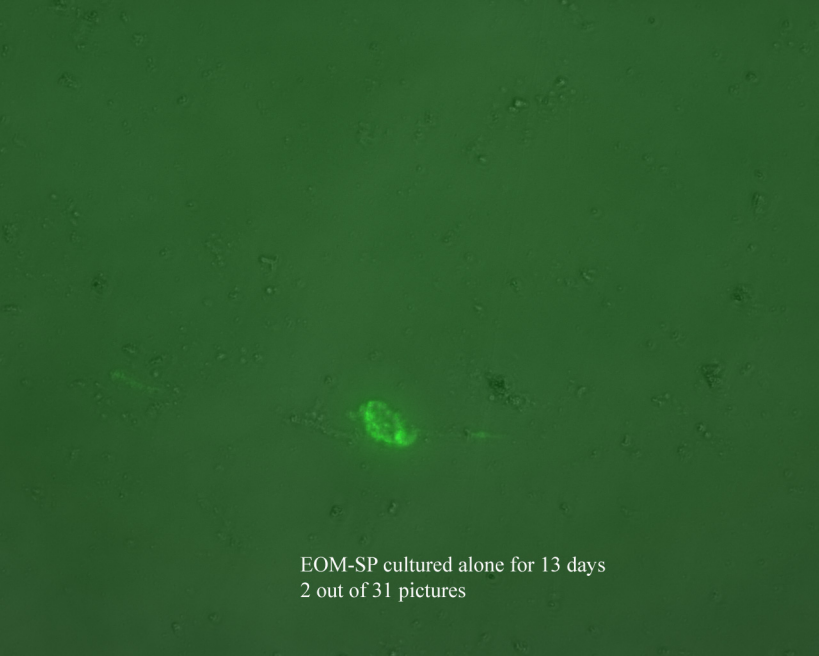

EOM-SP cultured alone for 13 days  
2 out of 31 pictures

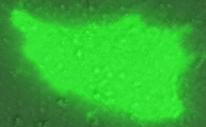

EOM-SP cultured alone for 13 days  
3 out of 31 pictures

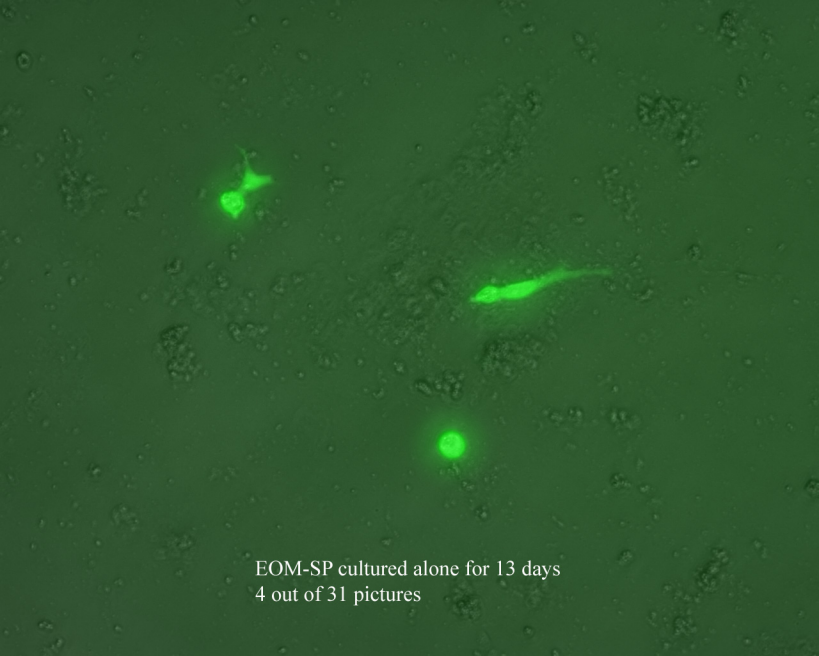

EOM-SP cultured alone for 13 days  
4 out of 31 pictures



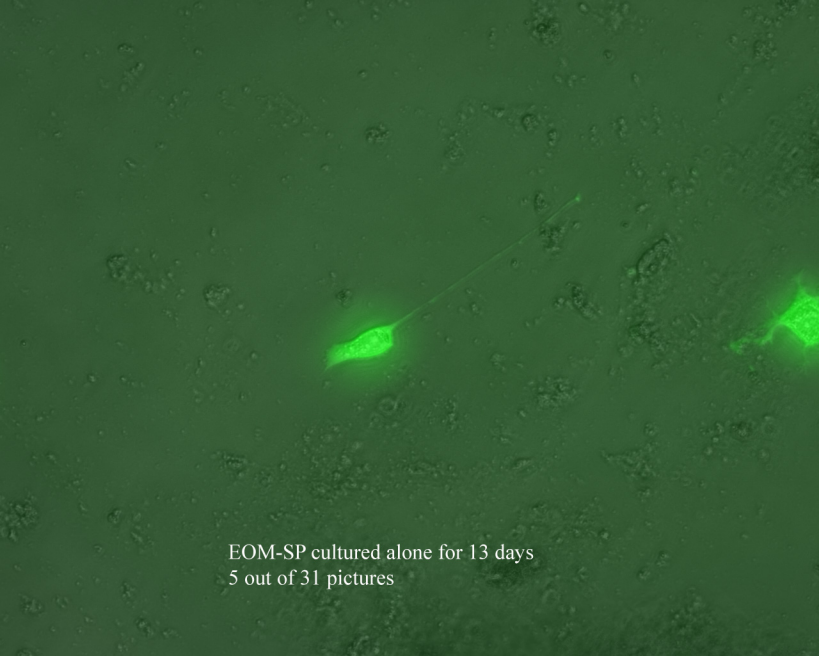

EOM-SP cultured alone for 13 days  
5 out of 31 pictures

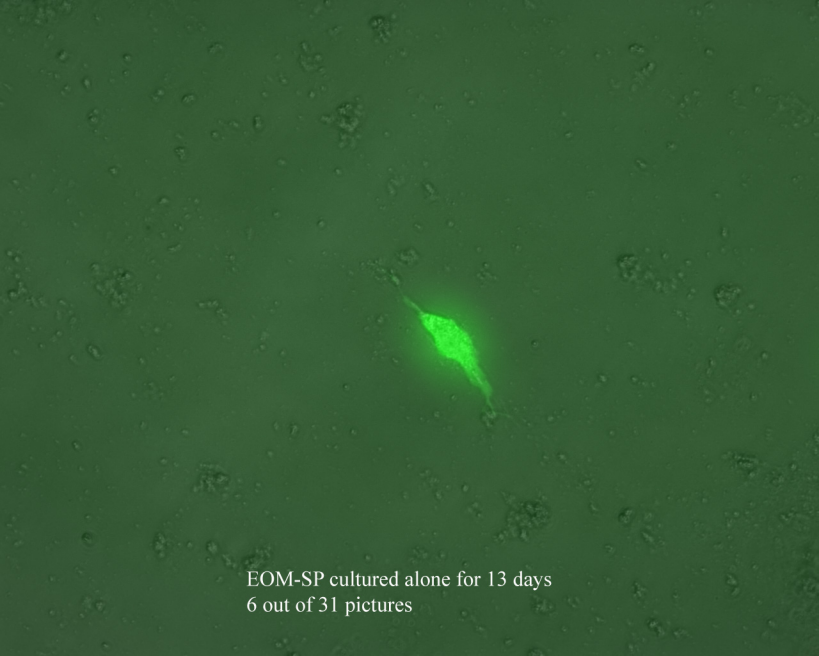

EOM-SP cultured alone for 13 days  
6 out of 31 pictures



EOM-SP cultured alone for 13 days  
7 out of 31 pictures

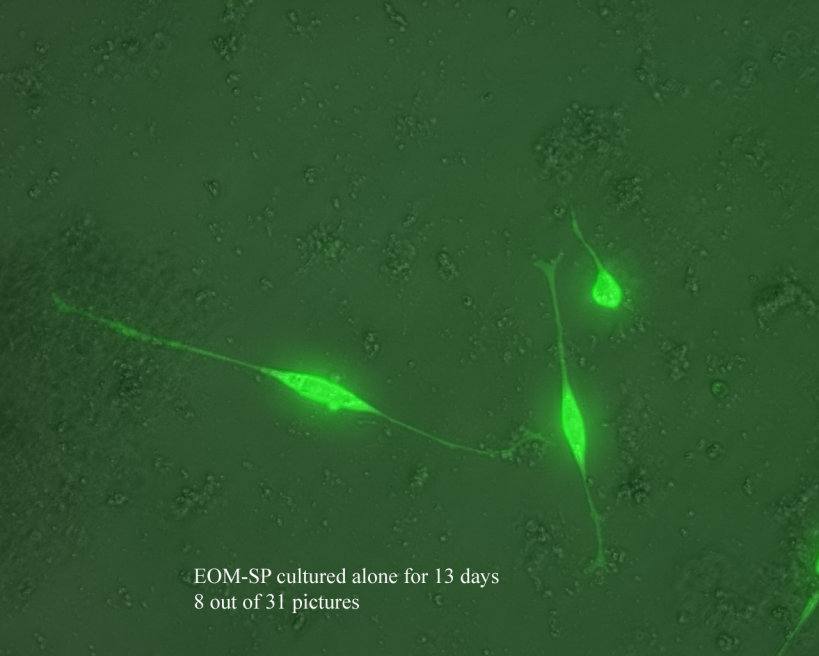

EOM-SP cultured alone for 13 days  
8 out of 31 pictures

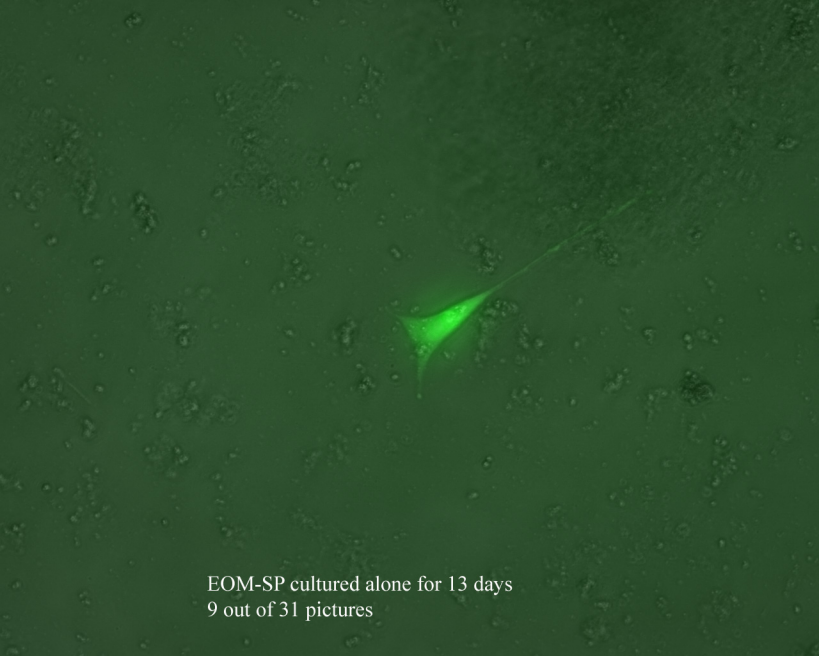

EOM-SP cultured alone for 13 days  
9 out of 31 pictures

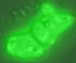

EOM-SP cultured alone for 13 days  
10 out of 31 pictures

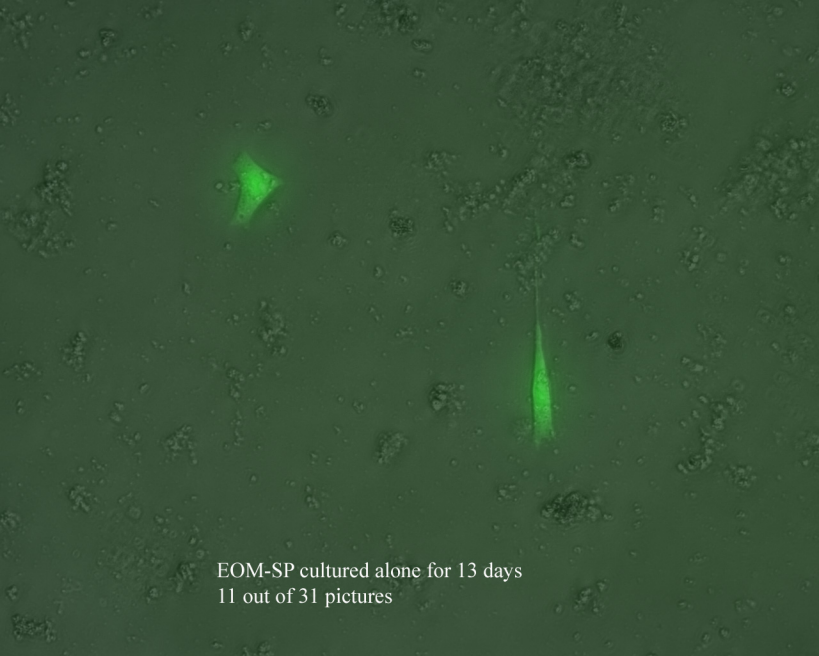

EOM-SP cultured alone for 13 days  
11 out of 31 pictures

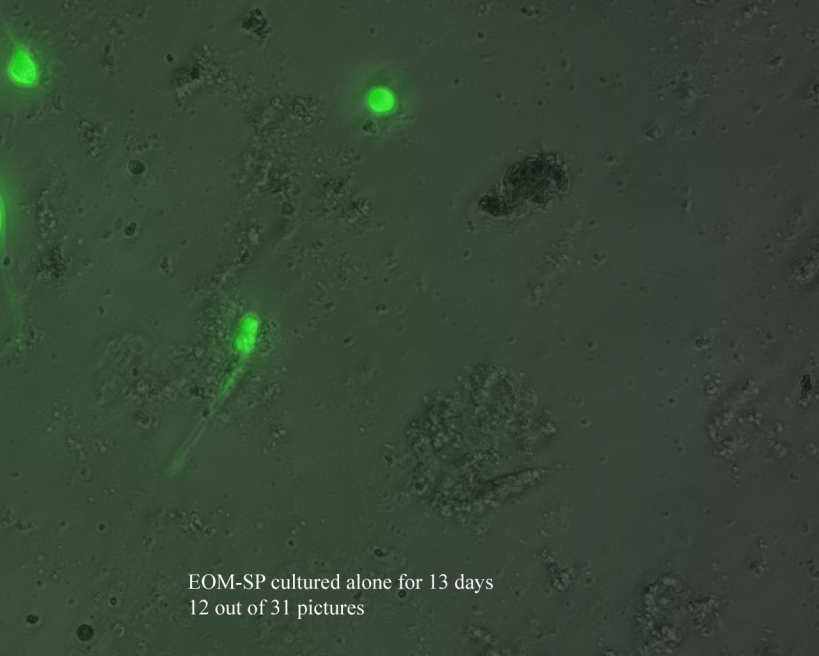

EOM-SP cultured alone for 13 days  
12 out of 31 pictures



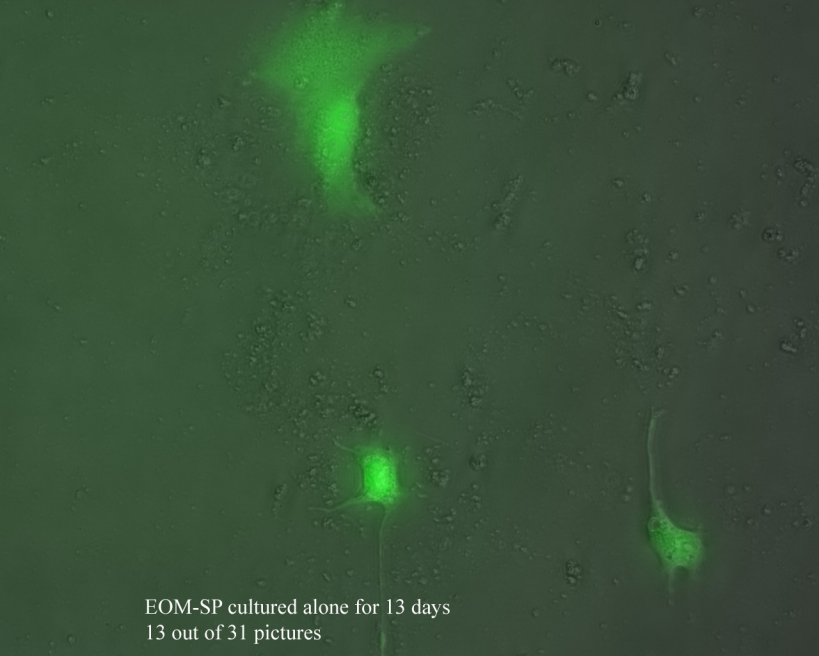

EOM-SP cultured alone for 13 days  
13 out of 31 pictures

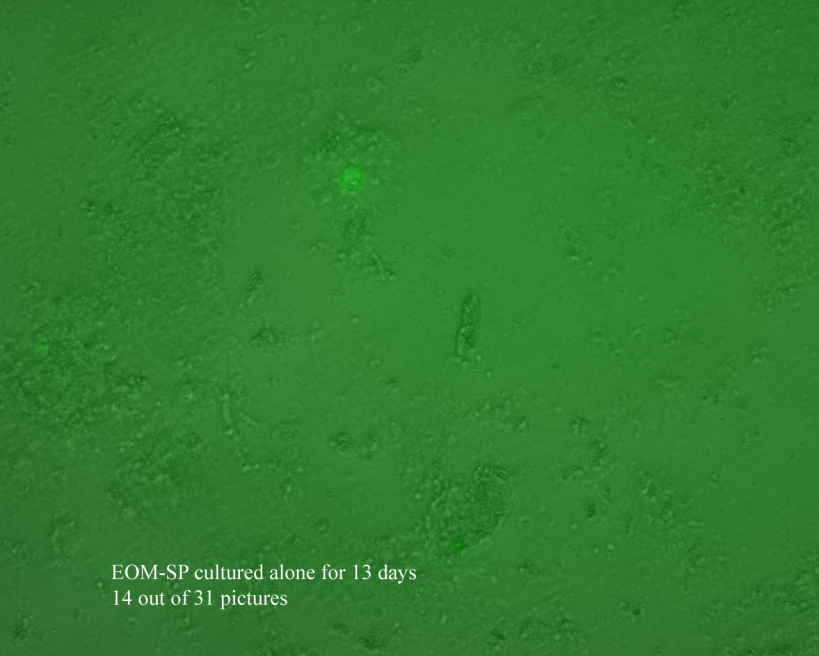

EOM-SP cultured alone for 13 days  
14 out of 31 pictures

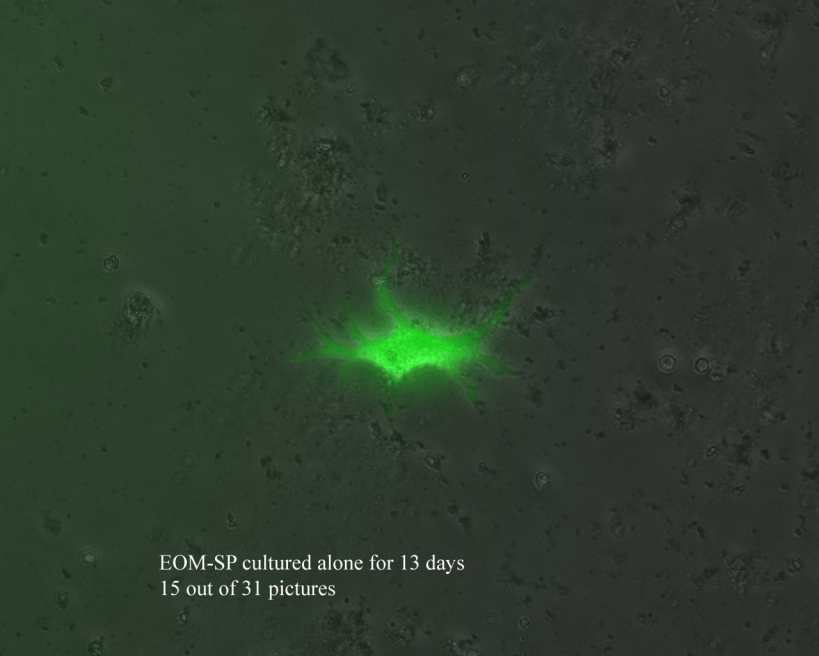

EOM-SP cultured alone for 13 days  
15 out of 31 pictures

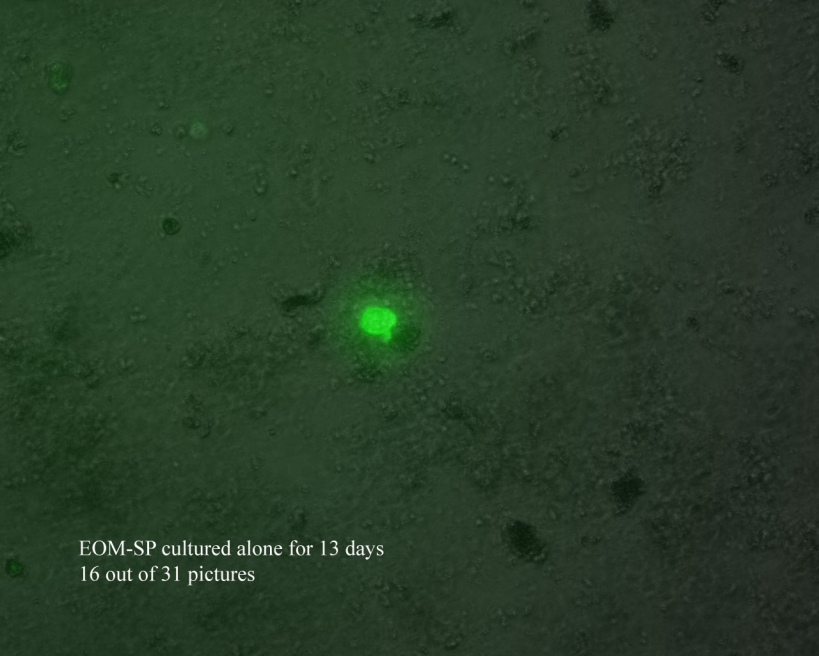

EOM-SP cultured alone for 13 days  
16 out of 31 pictures



EOM-SP cultured alone for 13 days  
17 out of 31 pictures

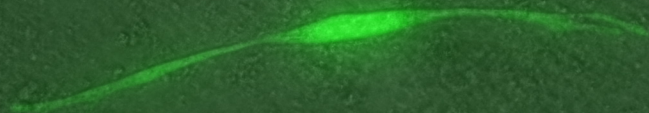

EOM-SP cultured alone for 13 days  
18 out of 31 pictures

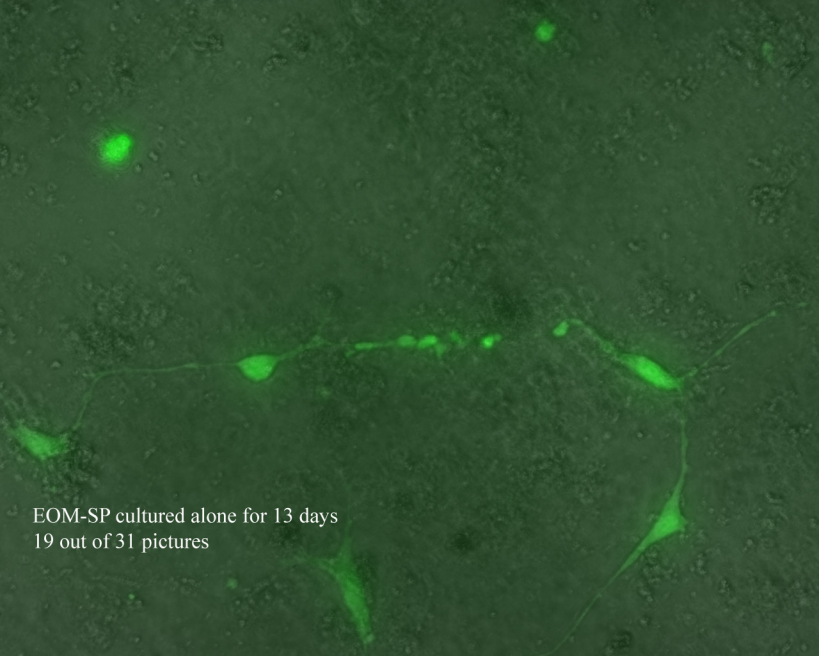

EOM-SP cultured alone for 13 days  
19 out of 31 pictures

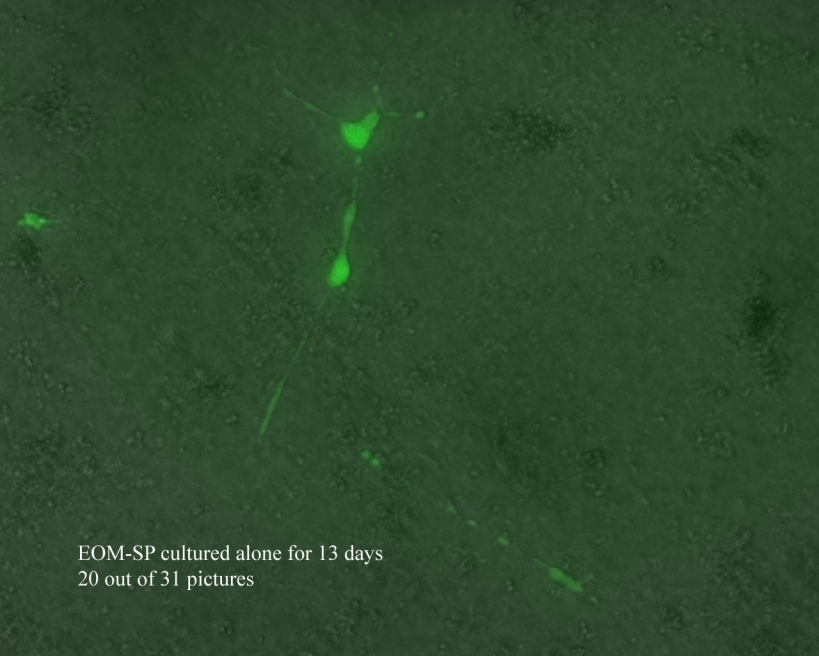

EOM-SP cultured alone for 13 days  
20 out of 31 pictures





EOM-SP cultured alone for 13 days  
21 out of 31 pictures

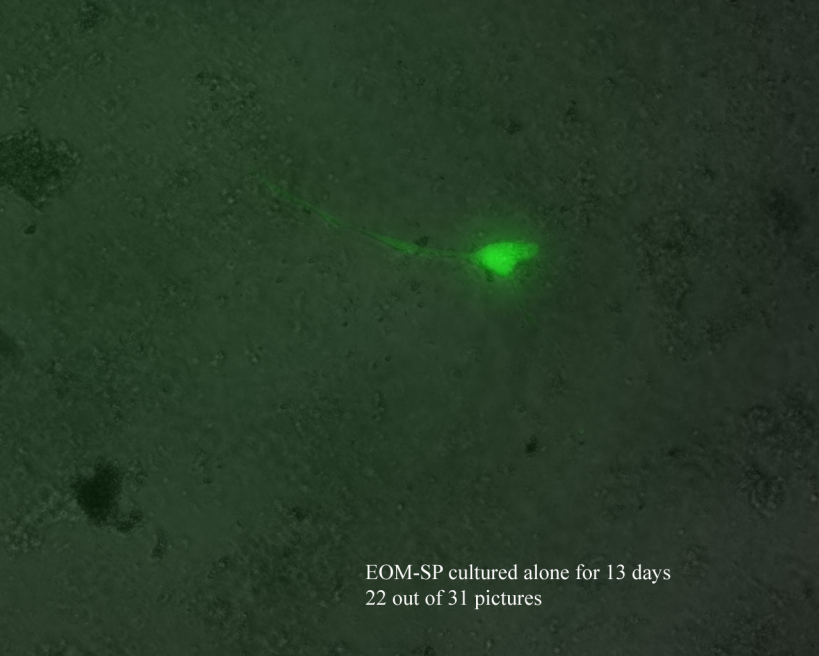

EOM-SP cultured alone for 13 days  
22 out of 31 pictures

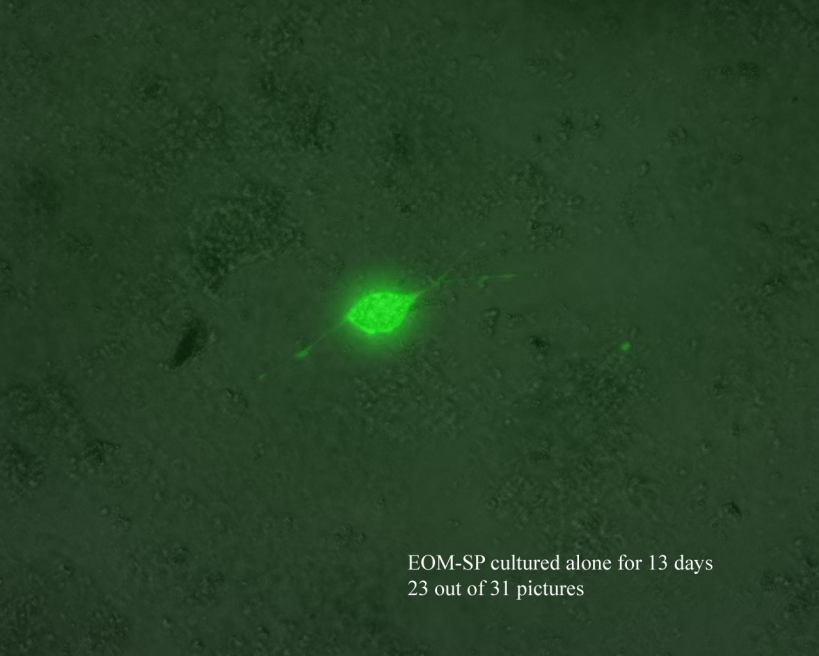

EOM-SP cultured alone for 13 days  
23 out of 31 pictures

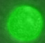

EOM-SP cultured alone for 13 days  
24 out of 31 pictures

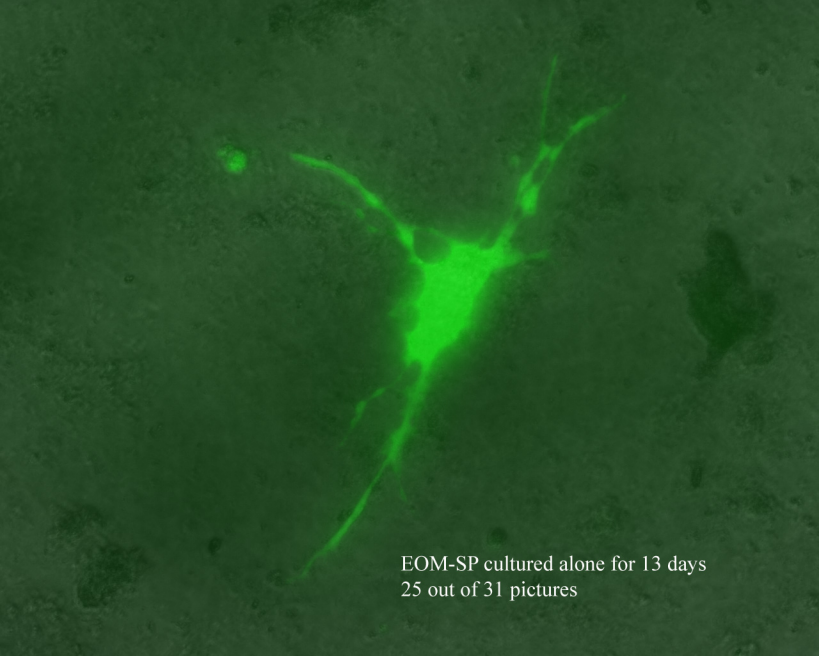

EOM-SP cultured alone for 13 days  
25 out of 31 pictures

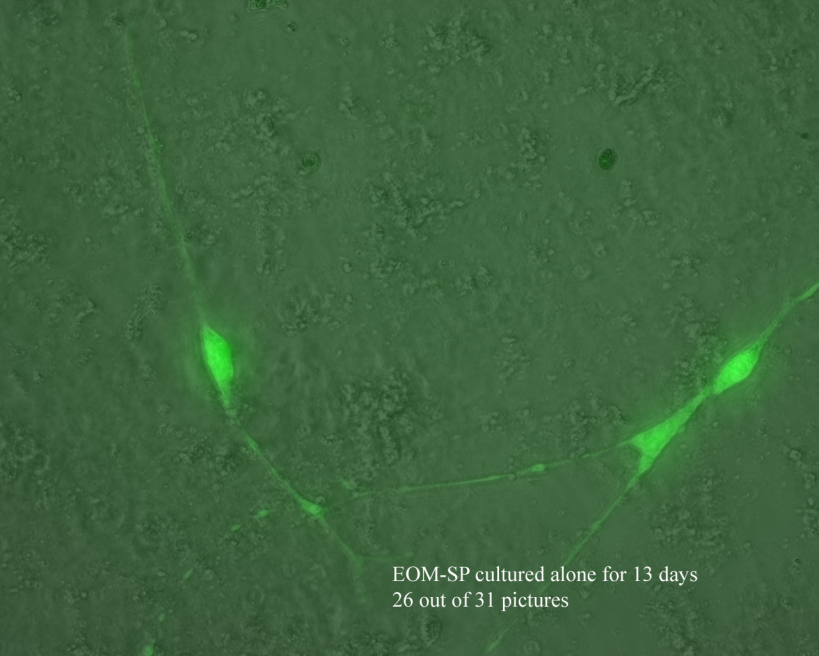

EOM-SP cultured alone for 13 days  
26 out of 31 pictures

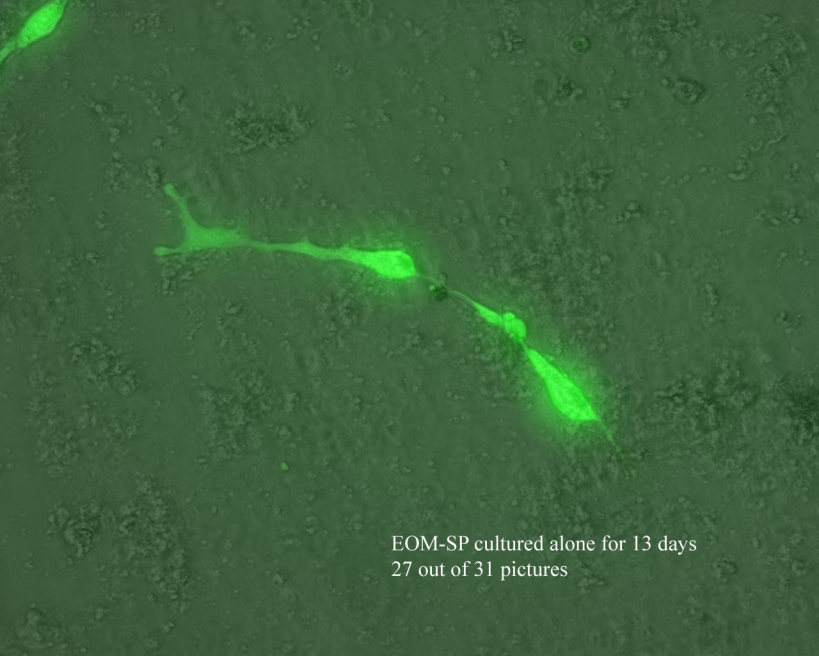

EOM-SP cultured alone for 13 days  
27 out of 31 pictures

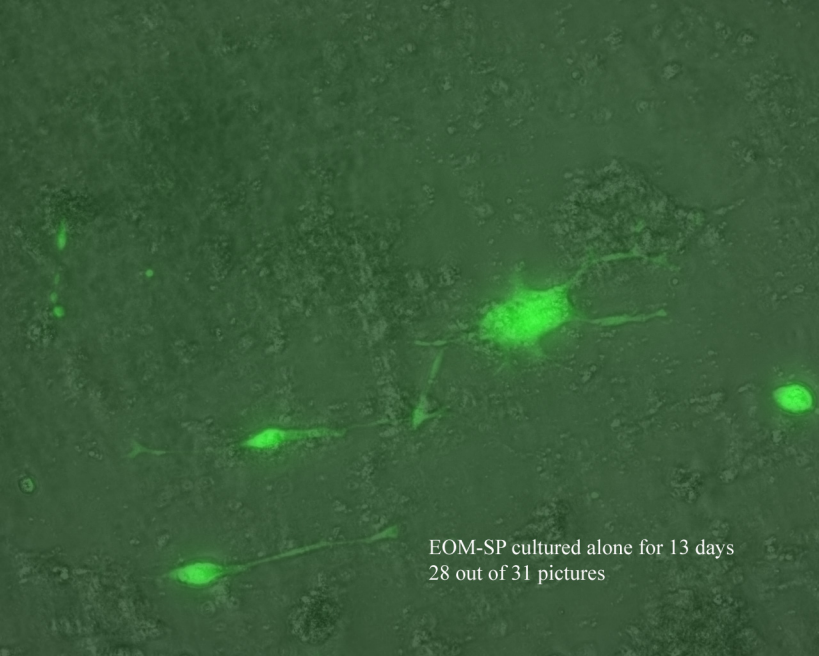

EOM-SP cultured alone for 13 days  
28 out of 31 pictures



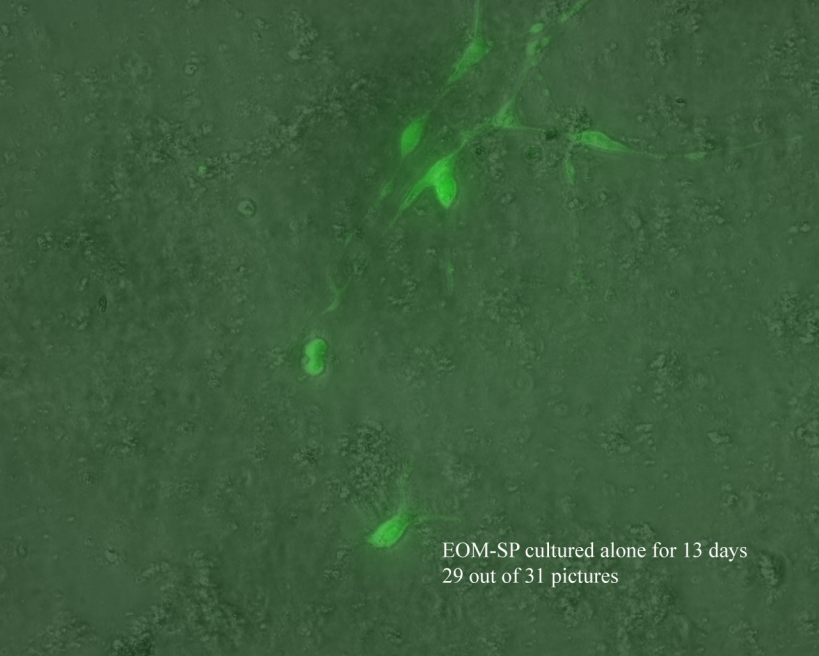

EOM-SP cultured alone for 13 days  
29 out of 31 pictures

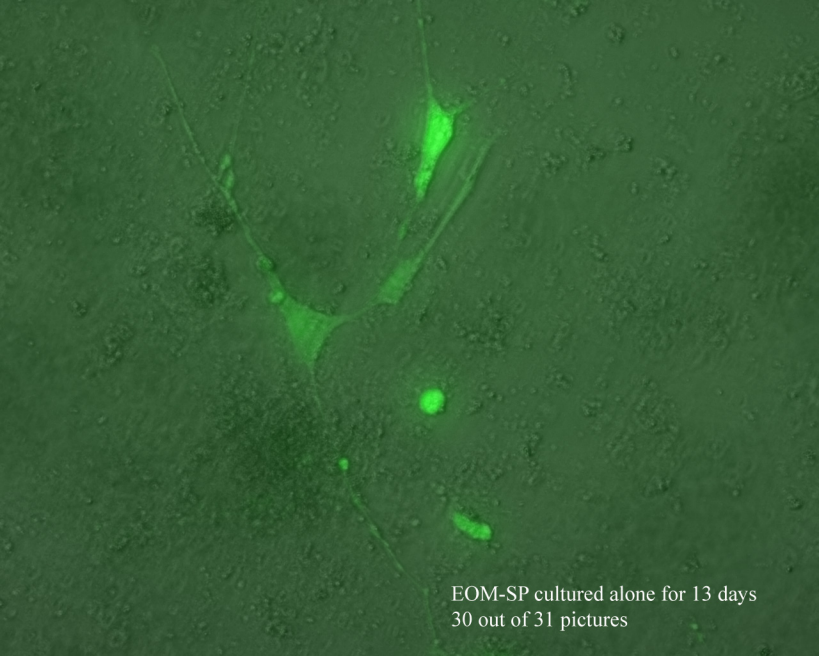

EOM-SP cultured alone for 13 days  
30 out of 31 pictures

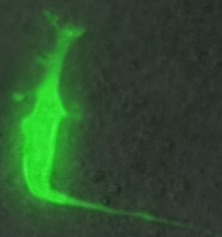

EOM-SP cultured alone for 13 days  
31 out of 31 pictures

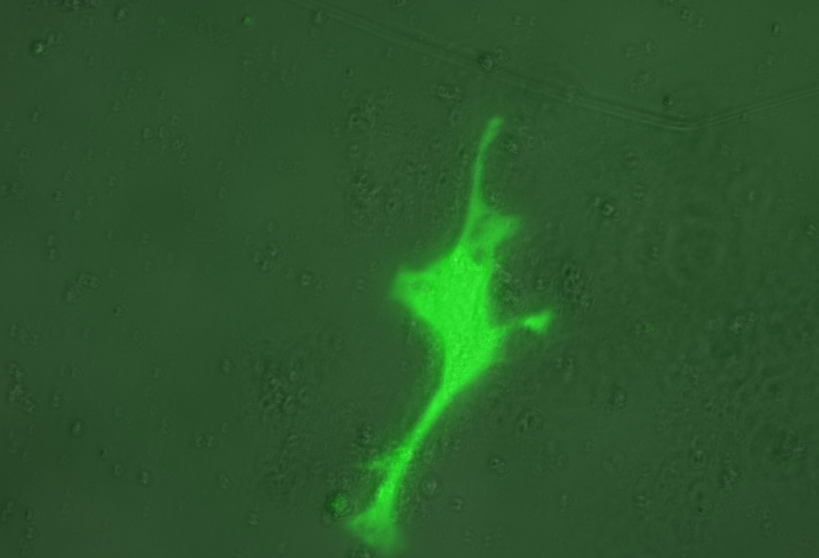

TA-SP cultured alone for 13 days  
1 out of 16 pictures

TA-SP cultured alone for 13 days  
2 out of 16 pictures

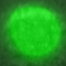

TA-SP cultured alone for 13 days  
3 out of 16 pictures

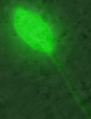

TA-SP cultured alone for 13 days  
4 out of 16 pictures

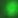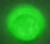

TA-SP cultured alone for 13 days  
5 out of 16 pictures



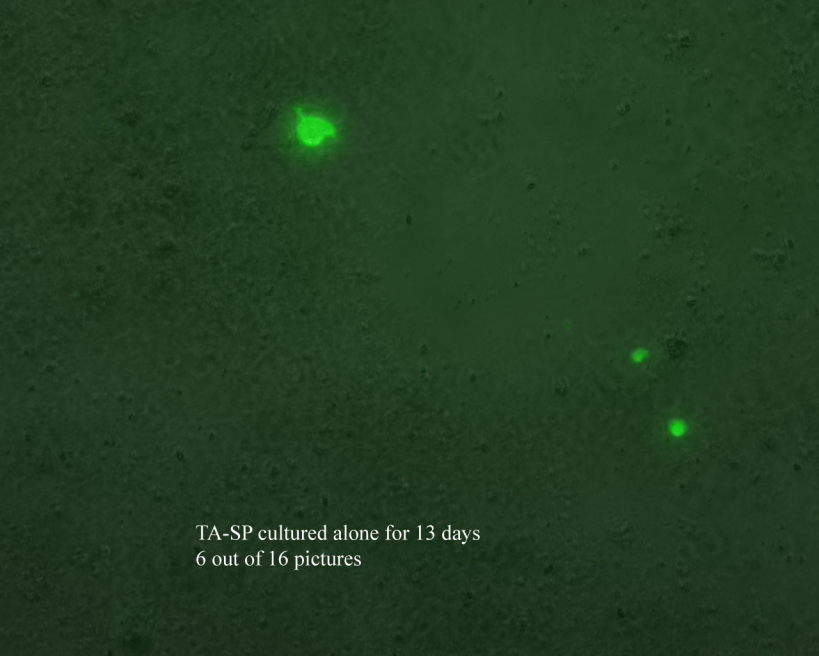A fluorescence microscopy image showing TA-SP cells after 13 days of culture. The image is predominantly dark green, with several bright green spots indicating fluorescently labeled cells. One large, bright green spot is located in the upper left quadrant, while two smaller, bright green spots are positioned in the lower right quadrant. The background is a dark, textured green.

TA-SP cultured alone for 13 days  
6 out of 16 pictures

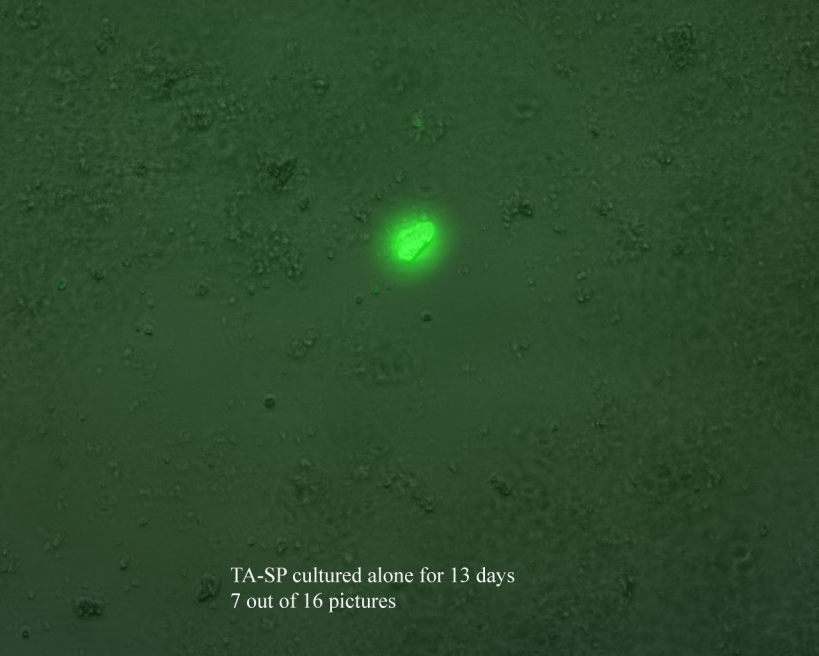

TA-SP cultured alone for 13 days  
7 out of 16 pictures

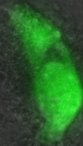

TA-SP cultured alone for 13 days  
8 out of 16 pictures

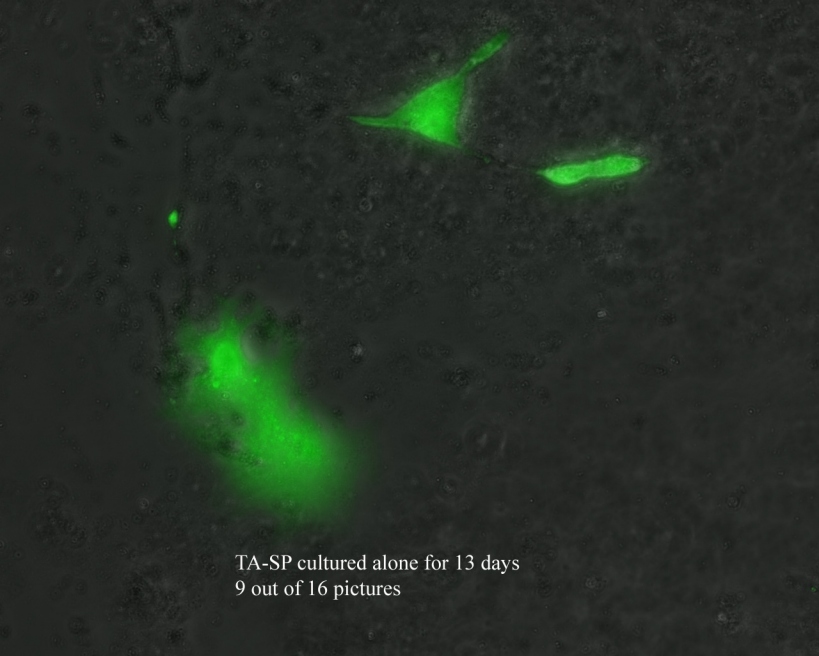

TA-SP cultured alone for 13 days  
9 out of 16 pictures

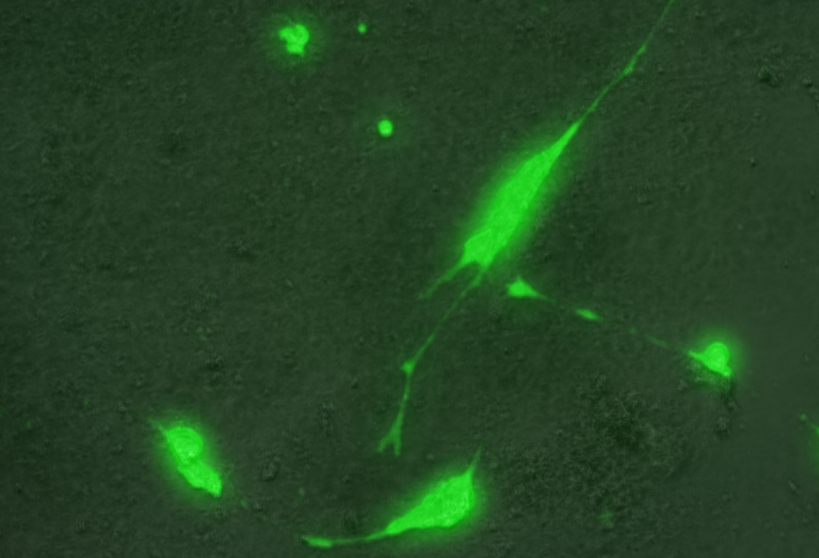

TA-SP cultured alone for 13 days  
10 out of 16 pictures

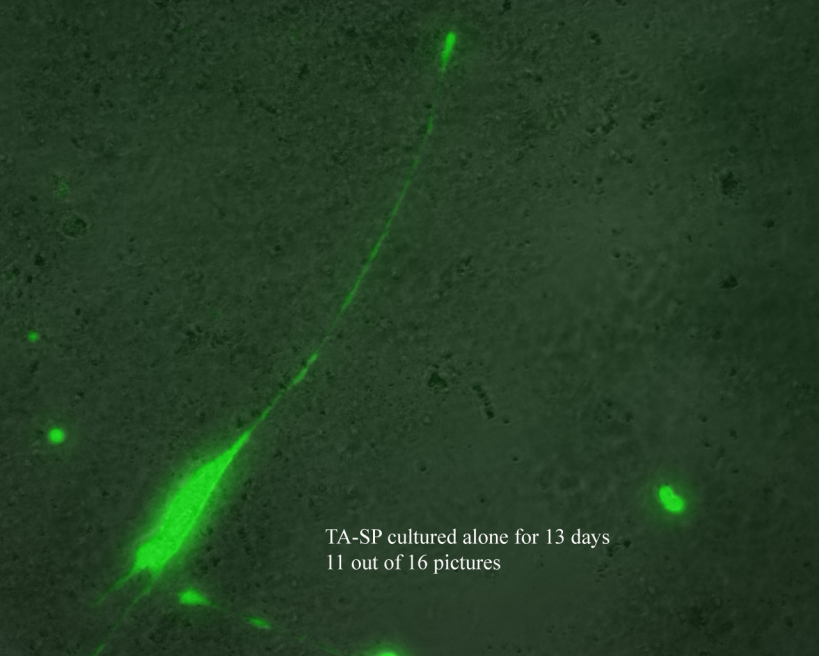

TA-SP cultured alone for 13 days  
11 out of 16 pictures

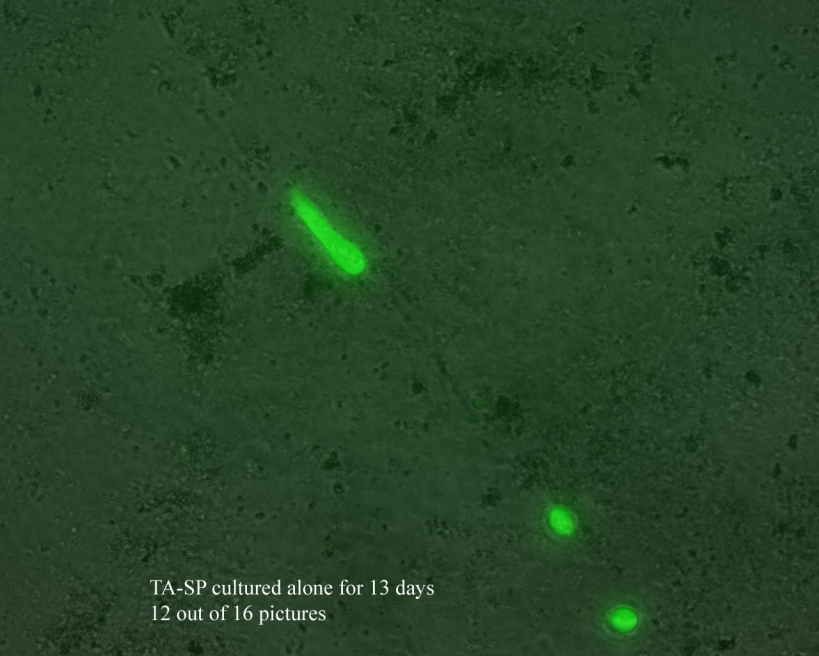

TA-SP cultured alone for 13 days  
12 out of 16 pictures

A fluorescence microscopy image showing a single, bright green fluorescent spot in the center of a dark green field. The spot has a slightly irregular, triangular shape with some internal texture. The surrounding field is dark green with a grainy, speckled appearance, likely representing the background or other cells in the culture.

TA-SP cultured alone for 13 days  
13 out of 16 pictures



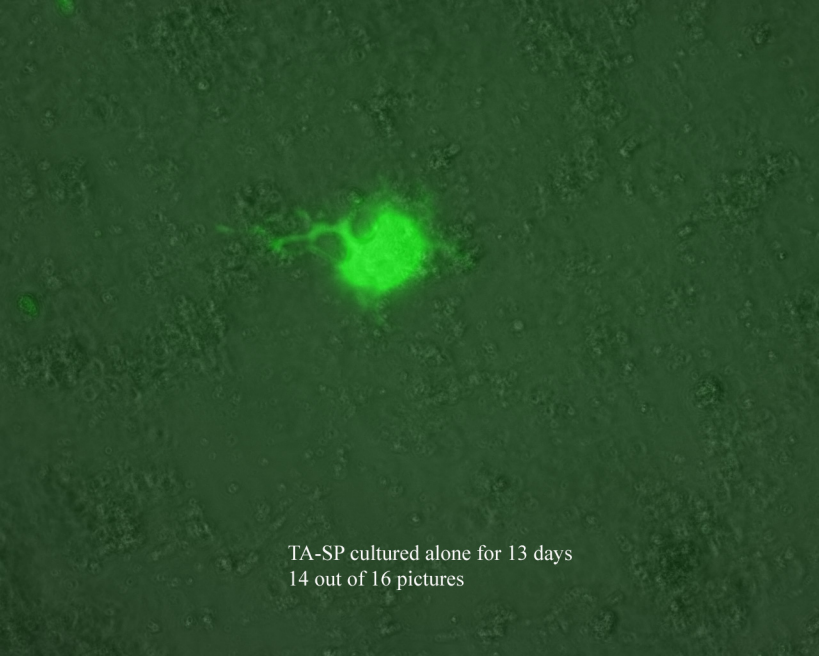

TA-SP cultured alone for 13 days  
14 out of 16 pictures

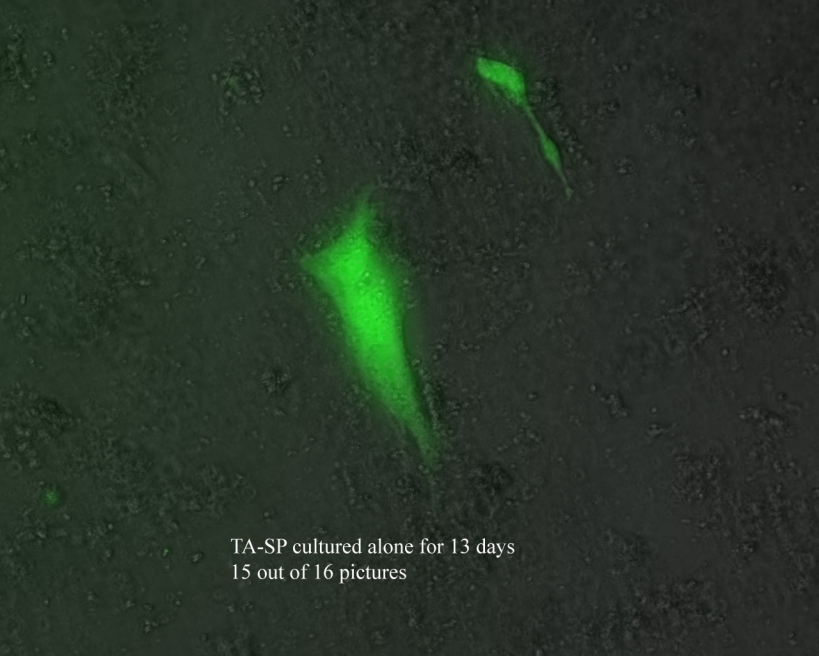

TA-SP cultured alone for 13 days  
15 out of 16 pictures

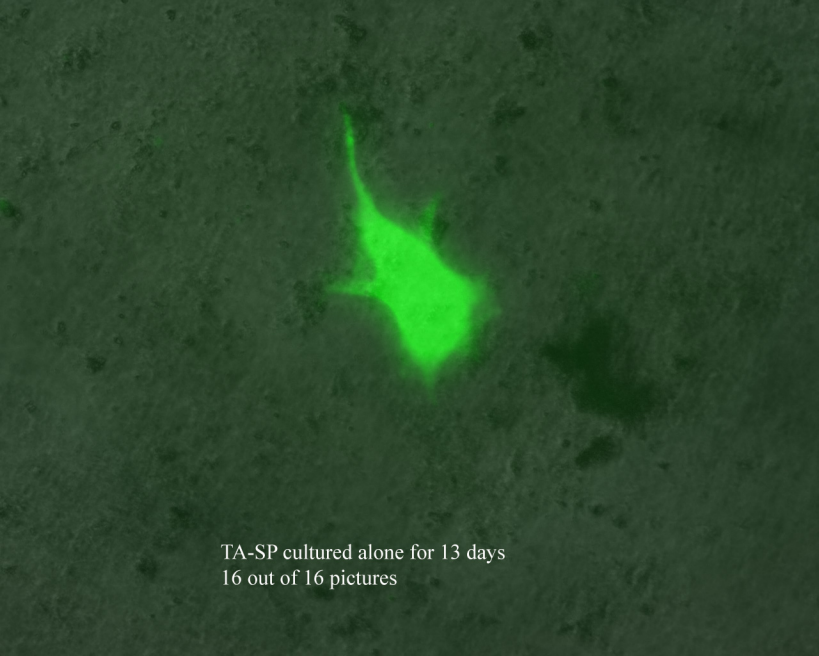

TA-SP cultured alone for 13 days  
16 out of 16 pictures
